# Supplementary material for: BMAL1 attenuates intracerebral hemorrhage-induced secondary brain injury in rats by regulating the Nrf2 signaling pathway
Source: PubMed Central journal article supplement — Ann Transl Med. 2021 Nov;9(21):1617. doi: 10.21037/atm-21-1863 (PMC8640921; doi:10.21037/atm-21-1863), 2021-11
Supplement: atm-09-21-1617-dss.pdf [file atm-09-21-1617-dss.pdf]

## Data Sharing Statement

|                     |                                                                                                                                                     |                                                                                                     |
|---------------------|-----------------------------------------------------------------------------------------------------------------------------------------------------|-----------------------------------------------------------------------------------------------------|
| <b>Article Info</b> | <a href="https://dx.doi.org/10.21037/atm-21-1863">https://dx.doi.org/10.21037/atm-21-1863</a>                                                       |                                                                                                     |
| <b>Item</b>         | <b>Question</b>                                                                                                                                     | <b>Authors' Response<br/>(place "-" if not applicable)</b>                                          |
| 1                   | Would you like to share data collected for your study to others?                                                                                    | No                                                                                                  |
| 2                   | If not, would you like to share the reason for your decision?                                                                                       | The data of this study is the basis of our next research, and the data cannot be shared at present. |
| 3                   | What data in particular will be shared?                                                                                                             | -                                                                                                   |
| 4                   | Any other documents will be shared? Such as study protocol, statistical analysis plan, informed consent form, clinical study report, analytic code. | -                                                                                                   |
| 5                   | When will data availability begin?                                                                                                                  | -                                                                                                   |
| 6                   | When will data availability end?                                                                                                                    | -                                                                                                   |
| 7                   | To whom will you share the data?                                                                                                                    | -                                                                                                   |
| 8                   | For what type of analysis or purpose?                                                                                                               | -                                                                                                   |
| 9                   | How or where can the data/documents be obtained?                                                                                                    | -                                                                                                   |
| 10                  | Any other restrictions?                                                                                                                             | -                                                                                                   |
